# Supplementary material for: Heme promotes sexual conversion of Plasmodium falciparum in human erythrocytes
Source: Frontiers journal article supplement (doi:10.3389/fmala.2023.1161750), 2023-06-26
Supplement: Data_Sheet_1.docx [file Data_Sheet_1.docx]

Supplementary Material

**Heme promotes sexual differentiation of *Plasmodium falciparum* in human erythrocytes**

Bethany Flage, Matthew R. Dent, Jesus Tejero, and Solomon Fiifi Ofori-Acquah*

*** Correspondence:** Solomon Fiifi Ofori-Acquah, [sfo2@pitt.edu](mailto:sfo2@pitt.edu)

# Supplementary Figures and Tables


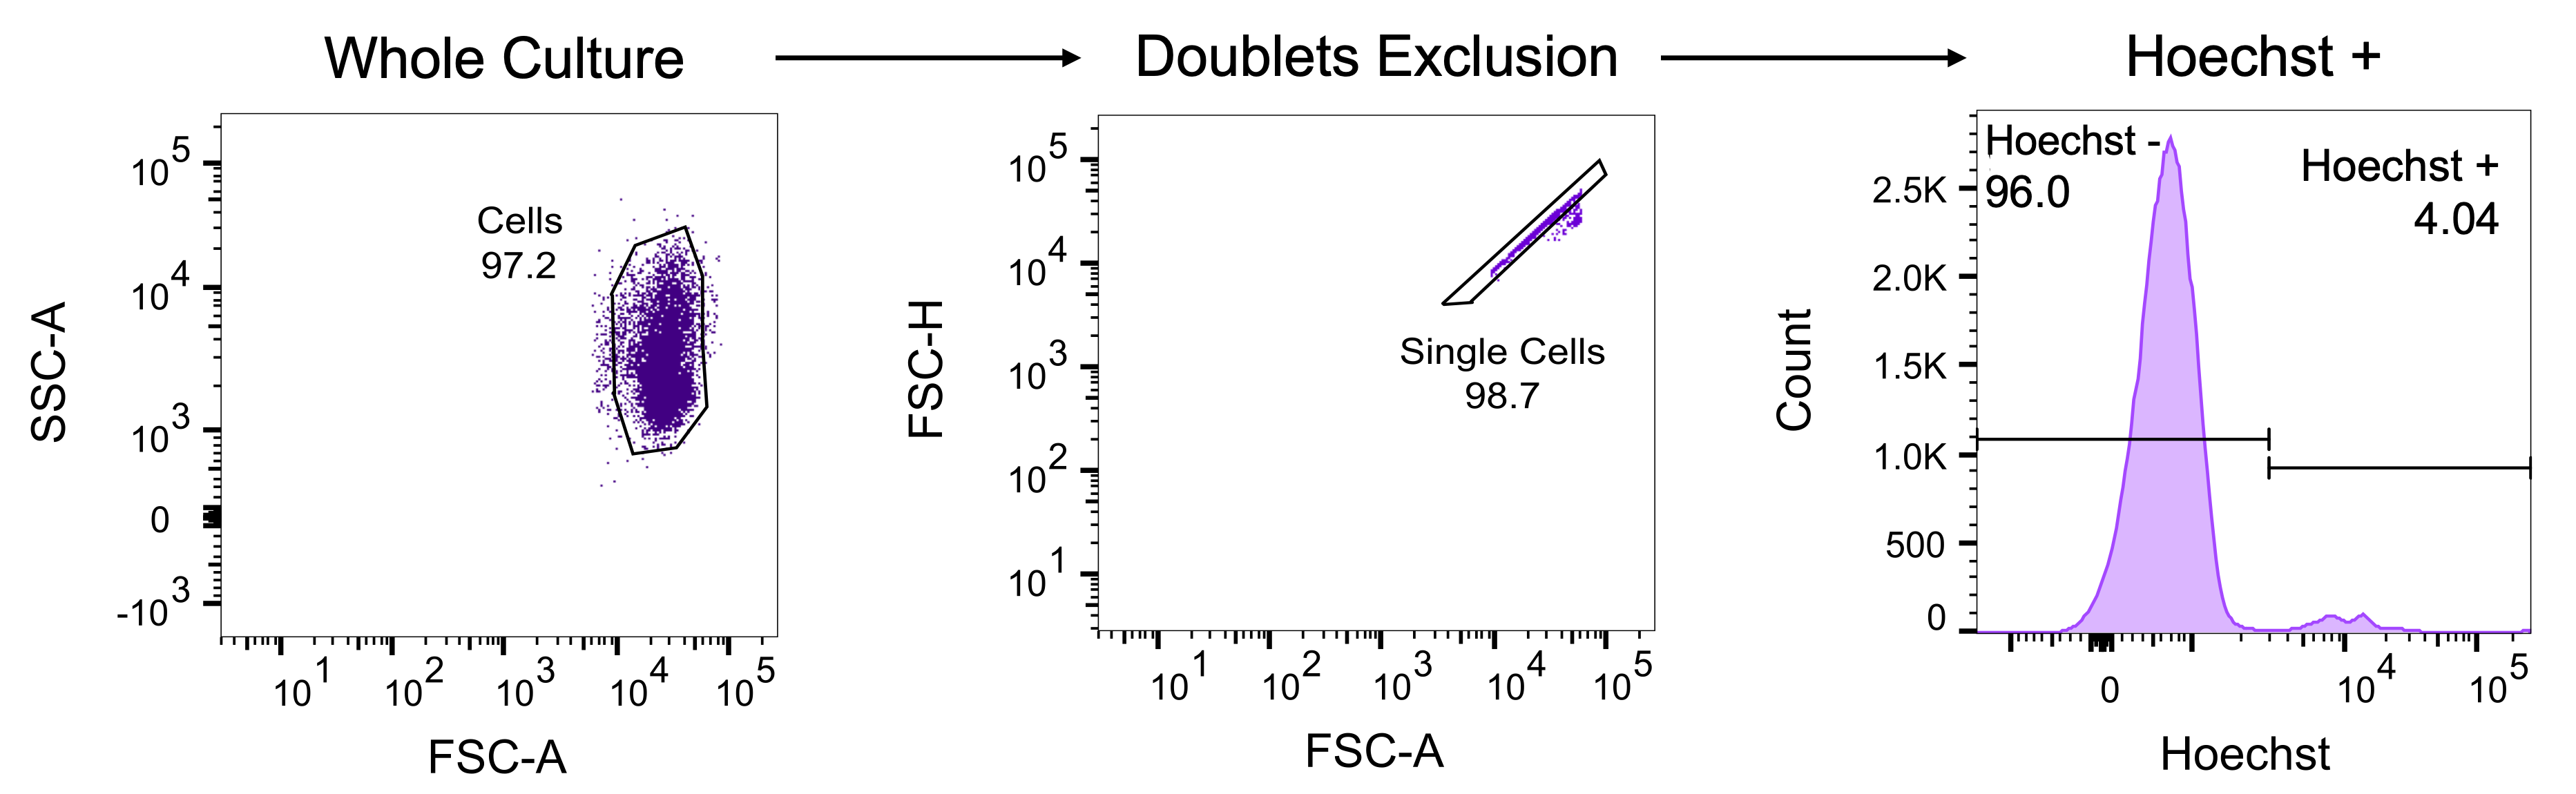


## Supplementary Figure 1. Flow cytometry gating strategy for measuring parasitemia. The main erythrocyte population (containing both parasitized and non-parasitized cells) was selected based on fsc versus ssc (left panel), followed by doublets exclusion based on fsc-h versus fsc-a (middle panel). Hoechst positivity was then determined using a histogram in which positive populations can be clearly distinguished from negative populations. Hoechst positivity indicates parasite presence within a cell, as mature erythrocytes do not contain nuclei. Therefore, the representative plot indicates a parasitemia of 4.04%.


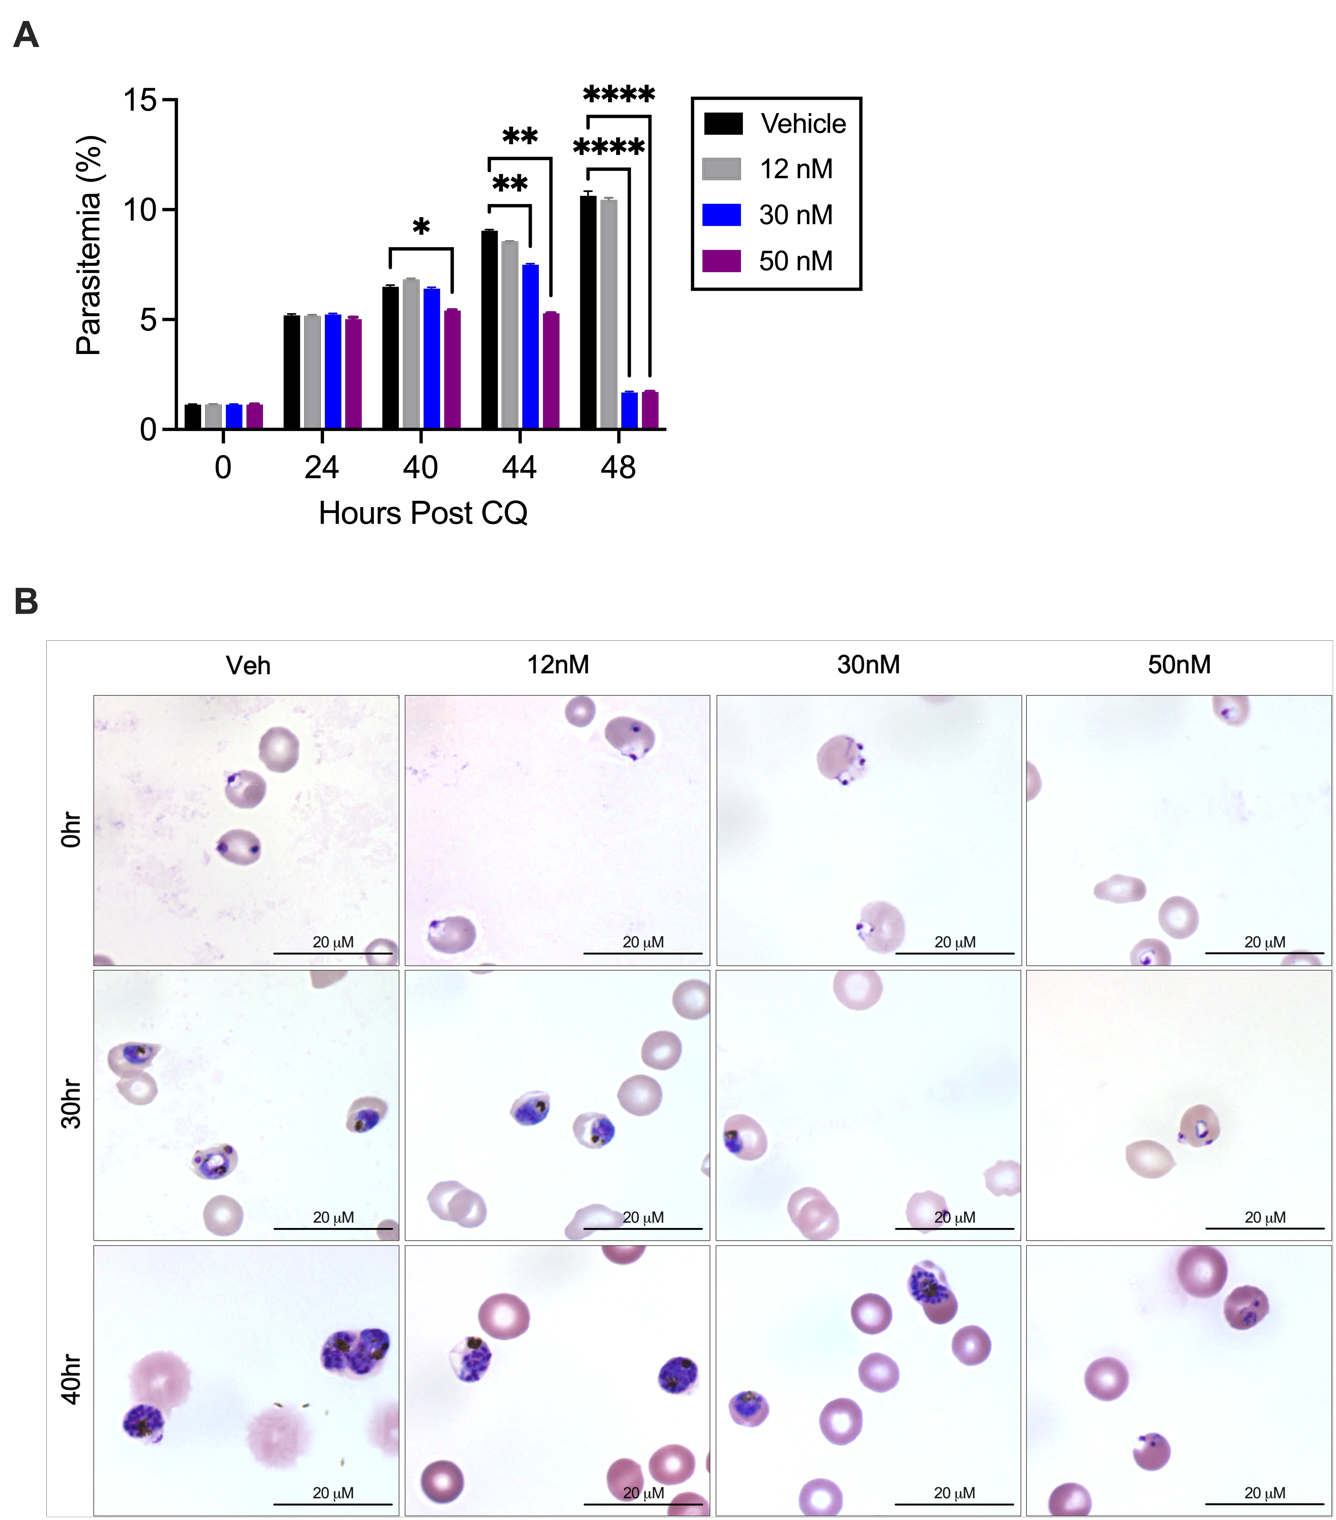


## Supplementary Figure 2. Parasite development during CQ exposure. (A) Parasitemia measured by flow cytometry at 0, 24, 40, 44, and 48hrs. Little change in total parasitemia is observed through 40hrs of CQ treatment. (B) Representative images of cultures at 0, 30, and 40hrs of CQ treatment. Images captured using Olympus Provis microscope (100x) and obtained from blood smears stained with Giemsa. No morphological changes apparent through 30nM treatment.

## Supplementary Table 1. qRT-PCR and ChIP Primers

| **qRT-PCR** |  |  |
| --- | --- | --- |
| **Gene ID** |  | **Sequence (5'-3')** |
| PF3D7_1218600 | tRNA synthetase Fw | AGCTAAAGAGATGCATGTTGGTCATT |
| tRNA synthetase Rv | GAGTACCCCAATCACCTACATGA |
| PF3D7_0935400 | gdv1 Fw | TAGGCGTCGAAATAGTGCTAGTAGAAA |
| gdv1 Rv | GTCCTCACAACCAGCATCATTAGTA |
| PF3D7_1222600 | ap2g Fw | TGGTGGTAATAAGAACAACAGAGGT |
| ap2g Rv | CCATCATAATCTTCTTCTTCGTCG |
| PF3D7_1335000 | msrp1 Fw | TACCAGGTGCCTTATCAAGTG |
| msrp1 Rv | CTTGGTTGTGATTCGGTTGATG |
| PF3D7_0936600 | gexp5 Fw | GTGGTTGTTTGAGAAGTGGTGA |
| gexp5 Rv | ACAGAATCCGTTTGAGATGATGA |
| PF3D7_0113600 | surfin 1.2 Fw | TTTTTCCCTCGATCTCCGCG |
| surfin 1.2 Rv | GGGTTTGGCCGTACTCTACT |
| PF3D7_1301800 | surfin 13.1 Fw | ACCCGAAGTGACAACATCTCC |
| surfin 13.1 Rv | TCTCCACGAGTTCCAAGTTTT |
| PF3D7_1115700 | fal2 Fw | GCTTGTAGGTTTT GGTATGAAAGAA |
| fal2 Rv | AGATAGGTCCCTTTTTAAAATACTATTGAC |
| PF3D7_1446800 | hdp Fw | AACCAACGACCCAGAAAGTATAA |
| hdp Rv | TCCATGTTGTTACCTGTAGGATG |
|  | | |
| **ChIP qPCR Primers** |  |  |
| **Gene ID** | **Name** | **Sequence (5'-3')** |
| PF2D7_1246200 | actin-1 Fw | agcagcaggaatccacaca |
| actin-1 Rv | tgatggtgcaagggttgtaa |
| PF3D7_1222600 | ap2g- Fw | tggtggtaataagaacaacagaggt |
| ap2g- Rv | ccatcataatcttcttcttcgtcg |
| PF3D7_0412400 | pfemp1- Fw | accgccccatctagtgatag |
| pfemp1- Rv | cacttggtgatgtggtgtca |

**
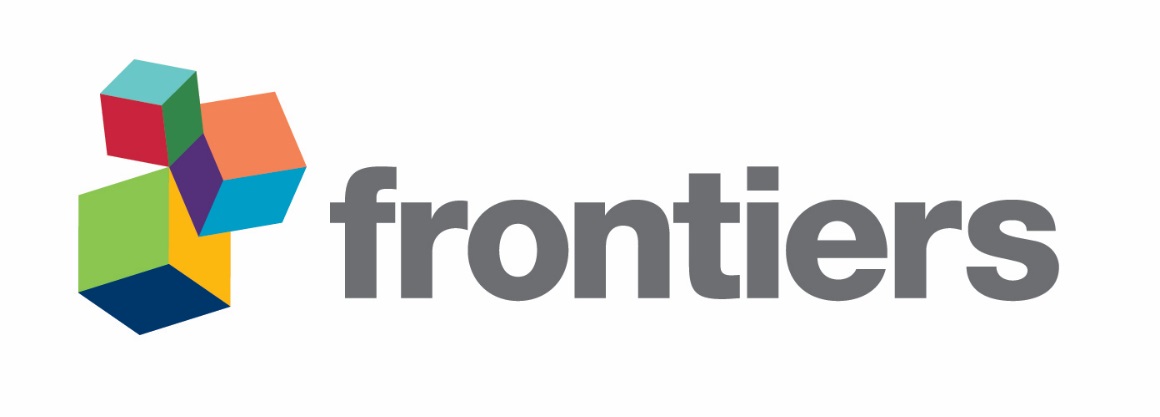
**
